# Supplementary material for: Cerebral microbleed distribution following cardiac surgery can mimic cerebral amyloid angiopathy
Source: HighWire-hosted journal article supplement (doi:10.1136/bmjno-2021-000166), 2021-07-01
Supplement: bmjno-2021-000166supp001_data_supplement.pdf [file bmjno-2021-000166supp001_data_supplement.pdf]

## Supplemental, correlation between degree of white matter changes and total CMB burden

| WMC      | Total CMBs |       |      | OR  | CI      | p-value |
|----------|------------|-------|------|-----|---------|---------|
|          | >=10       | 1 - 9 | Zero |     |         |         |
| Mild     | 4          | 20    | 13   | -   | -       | -       |
| Moderate | 5          | 24    | 6    | 2.5 | 2.0-3.1 | <0.001  |
| Severe   | 9          | 19    | 5    | 3.9 | 3.2-4.7 | <0.001  |
| Total    | 22         | 75    | 26   |     |         |         |

WMC = white matter changes; CMBs = cerebral microbleeds; OR = odds ratio; CI =

confidence interval
